# Supplementary material for: New Insights Into Structure and Function of TIFY Genes in Zea mays and Solanum lycopersicum: A Genome-Wide Comprehensive Analysis
Source: Front Genet. 2021 May 12;12:657970. doi: 10.3389/fgene.2021.657970 (PMC8155530; doi:10.3389/fgene.2021.657970)
Supplement: Supplementary file 2 [file Table_1.XLSX]

## Sheet: Sheet1
Group	Gene 1	Gene 2	Ka	Ks	Ka/Ks	p-value
A	Zm00001d009438	Zm00001d004277	0.0943101	0.12946	0.728491	2.41794e-07
	Zm00001d004277	Zm00001d034536	0.0834192	0.123566	0.675096	6.4221e-07
	Zm00001d035382	Zm00001d034536	0.0506184	0.0644019	0.785977	6.8601e-09
	Zm00001d041045	Zm00001d034536	0.0675245	0.0760144	0.888312	7.83617e-16
	Zm00001d034536	Zm00001d048263	0.0530673	0.0289891	1.83059	3.41999e-15
B	Zm00001d032009	Zm00001d005726	1.33264	1.39229	0.957153	1.65709e-11
	Zm00001d050952	Zm00001d016316	0.03489	0.0631953	0.552099	1.55405e-12
C	Zm00001d044708	Zm00001d026477	0.0566	0.0649	0.872111	6.98766e-07
	Zm00001d033972	Zm00001d002029	0.111809	0.225823	0.495117	2.71835e-18
	Zm00001d033972	Zm00001d026477	0.1148	0.1158	0.991364	5.05778e-13
	Zm00001d002029	Zm00001d026477	0.177529	0.240152	0.739239	1.86518e-08
D	Zm00001d028313	Zm00001d022139	0.137321	0.130345	1.05351	1.8616e-05
	Zm00001d022139	Zm00001d006860	0.0740087	0.150472	0.491842	4.97724e-14
	Zm00001d022139	Zm00001d024455	0.0771321	0.117889	0.654277	3.08711e-10
	Zm00001d022139	Zm00001d049005	0.137321	0.130345	1.05351	2.75049e-15
E	Zm00001d036494	Zm00001d014656	0.0960624	0.109437	0.877784	4.0154e-14
A	Solyc01g009730	Solyc01g009740	0.219655	0.283219	0.775565	1.22809e-06
B	Solyc08g036640	Solyc08g036620	0.112798	0.191691	0.588436	5.38458e-07
	Solyc08g036640	Solyc08g036660	0.137333	0.240802	0.570317	1.2351e-05
