# Supplementary material for: New Insights Into Structure and Function of TIFY Genes in Zea mays and Solanum lycopersicum: A Genome-Wide Comprehensive Analysis
Source: Front Genet. 2021 May 12;12:657970. doi: 10.3389/fgene.2021.657970 (PMC8155530; doi:10.3389/fgene.2021.657970)
Supplement: Supplementary file 3 [file Table_2.XLSX]

## Sheet: Sheet1
Species 1	Species 2	Ka	Ks	Ka/Ks	Date (MYA)
Solyc09g065630	AT4G14713	0.66	1.54	0.428571	118.462
Solyc03g118540	AT1G48500	0.7	1.96	0.357143	150.769
	AT3G17860	0.62	1.55	0.4	119.231
Solyc06g068930	AT3G17860	0.7	1.62	0.432099	124.615
Solyc04g076530	AT4G24470	0.74	1.42	0.521127	109.231
Zm00001d033048	LOC_Os10g25290	0.56	0.64	0.875	49.2308
Zm00001d002029	LOC_Os04g55920	0.21	0.59	0.355932	45.3846
Zm00001d027900	LOC_Os03g08330	0.54	0.74	0.72973	56.9231
Zm00001d033050	LOC_Os10g25230	0.32	0.61	0.52459	46.9231
Zm00001d005726	LOC_Os09g23650	0.26	1.04	0.25	80
	LOC_Os08g33160	0.4	1.27	0.314961	97.6923
Zm00001d027901	LOC_Os10g25250	0.63	0.79	0.797468	60.7692
Zm00001d022139	LOC_Os07g42370	0.19	0.63	0.301587	48.4615
	LOC_Os03g28940	0.3	1.05	0.285714	80.7692
Zm00001d005813	LOC_Os09g26780	0.25	0.8	0.3125	61.5385
Zm00001d003903	LOC_Os04g32480	0.35	0.74	0.472973	56.9231
Zm00001d033049	LOC_Os03g08310	0.73	0.63	1.15873	48.4615
Zm00001d027899	LOC_Os03g08310	0.42	0.54	0.777778	41.5385
Zm00001d014253	LOC_Os10g25230	0.29	0.42	0.690476	32.3077
	LOC_Os03g08310	0.58	0.7	0.828571	53.8462
Zm00001d048263	LOC_Os10g25230	0.37	0.74	0.5	56.9231
	LOC_Os03g08310	0.44	0.64	0.6875	49.2308
Zm00001d020614	LOC_Os09g26780	0.24	0.88	0.272727	67.6923
Zm00001d020409	LOC_Os09g23650	0.22	0.85	0.258824	65.3846
	LOC_Os08g33160	0.34	1.22	0.278689	93.8462
Zm00001d029448	LOC_Os07g42370	0.27	0.76	0.355263	58.4615
	LOC_Os03g28940	0.14	0.66	0.212121	50.7692
Zm00001d006860	LOC_Os07g42370	0.19	0.61	0.311475	46.9231
	LOC_Os03g08320	0.59	1.79	0.329609	137.692
	LOC_Os03g28940	0.28	0.95	0.294737	73.0769
Zm00001d050365	LOC_Os09g23650	0.71	1.17	0.606838	90
	LOC_Os08g33160	0.39	0.88	0.443182	67.6923
Zm00001d013331	LOC_Os03g52450	0.12	0.59	0.20339	45.3846
Zm00001d036494	LOC_Os06g48534	0.19	0.73	0.260274	56.1538
	LOC_Os02g05510	0.26	1.12	0.232143	86.1538
Zm00001d014656	LOC_Os06g48534	0.15	0.6	0.25	46.1538
	LOC_Os02g05510	0.25	1.1	0.227273	84.6154
