# Supplementary material for: New Insights Into Structure and Function of TIFY Genes in Zea mays and Solanum lycopersicum: A Genome-Wide Comprehensive Analysis
Source: Front Genet. 2021 May 12;12:657970. doi: 10.3389/fgene.2021.657970 (PMC8155530; doi:10.3389/fgene.2021.657970)
Supplement: Supplementary file 4 [file Table_3.XLSX]

## Sheet: Sheet1
Interacting proteins	Description	Molecular function	Biological process
GRMZM2G049229_P01, 103638892	Putative HLH DNA-binding domain superfamily protein	DNA-binding transcription factor activity, protein dimerization activity	-
GRMZM2G001930_P01, 541694	Transcription factor MYC7E	DNA-binding transcription factor activity, protein dimerization activity	-
GRMZM2G455115_P01	Cleavage and polyadenylation specificity factor subunit 1	RNA binding, nucleic acid binding	post-transcriptional gene silencing by RNA, mRNA 3'-end processing by stem-loop binding and cleavage, mRNA polyadenylation
GRMZM2G118697_P01
GRMZM2G360455_P01	Protein-serine/threonine phosphatase	magnesium-dependent protein serine/threonine phosphatase activity, cation binding, hydrolase activity, metal ion binding,	protein dephosphorylation
GRMZM2G427067_P01	DNA ligase 6	DNA ligase activity, DNA binding, ATP binding, nucleotide binding	DNA repair, DNA recombination, DNA ligation involved in DNA repair, DNA replication, cellular response to DNA damage stimulus
GRMZM2G024051_P01, pco110965	Cleavage stimulation factor	translation initiation factor activity, nucleic acid binding, RNA binding	translational initiation, pre-mRNA cleavage required for polyadenylation
GRMZM2G137968_P01, pco139890	Single-stranded DNA-dependent ATP-dependent helicase	DNA helicase activity, ATP binding, telomeric DNA binding, damaged DNA binding, telomeric DNA binding, hydrolase activity	DNA repair, DNA duplex unwinding, telomere maintenance, double-strand break repair via nonhomologous end joining, cellular response to gamma radiation, cellular response to X-ray, DNA recombination
