# Supplementary material for: New Insights Into Structure and Function of TIFY Genes in Zea mays and Solanum lycopersicum: A Genome-Wide Comprehensive Analysis
Source: Front Genet. 2021 May 12;12:657970. doi: 10.3389/fgene.2021.657970 (PMC8155530; doi:10.3389/fgene.2021.657970)
Supplement: Supplementary file 5 [file Table_4.XLSX]

## Sheet: Sheet1
Interacting proteins	Description	Molecular function	Biological process
Solyc06g084120.2.1, BS1	BIG SEEDS 1	-	regulation of defense response, regulation of jasmonic acid mediated signaling pathway, response to wounding, response to fungus
Solyc03g122190.2.1, SRG1	Salt responsive protein 1	-	response to wounding, regulation of defense response, regulation of jasmonic acid mediated signaling pathway
Solyc05g018320.2.1, 101266219	ninja-family protein mc410	-	negative regulation of transcription, DNA-templated, jasmonic acid mediated signaling pathway, signal transduction
Solyc05g052620.2.1, Coi1	Coronatine-insensitive 1	protein binding	protein ubiquitination, ubiquitin-dependent protein catabolic process, SCF-dependent proteasomal ubiquitin-dependent protein catabolic process, SCF ubiquitin ligase complex
Solyc08g076930.1.1, JA3	transcription factor MYC2	DNA binding, protein dimerization activity, protein binding	Plant hormone signal transduction, MAPK signaling pathway, defense response, multicellular organism development, regulation of growth, positive regulation of transcription, DNA-templated
Solyc08g005050.2.1, MYC1	transcription factor MYC1	transcription regulatory region sequence-specific DNA binding, protein dimerization activity	multicellular organism development, regulation of transcription, positive regulation of transcription, DNA-templated, trichome morphogenesis
Solyc11g011030.1.1, Prg1	Pto-responsive gene 1 protein	protein binding	regulation of defense response, regulation of jasmonic acid mediated signaling pathway, response to wounding
Solyc04g079730.1.1, aos	Allene oxide synthase 1	oxidoreductase activity, hydroperoxide dehydratase activity, lyase activity, monooxygenase activity, iron ion binding	oxidation-reduction process, jasmonic acid biosynthetic process, sterol metabolic process, fatty acid biosynthetic process, defense response, oxylipin biosynthetic process
